# Supplementary material
Source: PubMed Central journal article supplement (PMC4911280)
Supplement: NIHMS774700-supplement-supp_info.pdf [file NIHMS774700-supplement-supp_info.pdf]

## SUPPLEMENTARY INFORMATION

### 1. Anatomical spacing of penetrating arterioles.

In rodent neocortex, the density of penetrating arterioles has been estimated to be anywhere between 4 and 13 per  $\text{mm}^2$  (refs. <sup>15,20,38</sup>) and a similarly wide range has been reported in macaque neocortex as well<sup>39,40</sup>. In order to determine the spacing of arteries in our animals, we obtained large-scale z-stacks of the vasculature spanning 5.25 and 4.24  $\text{mm}^2$  per craniotomy in two cats. We used sequential *in vivo* two-photon imaging of  $800 \times 800 \mu\text{m}$  regions. These image stacks were then stitched together and the blood vessels in the large-scale stacks were traced using NeuroLucida software (MBF Bioscience). We found that penetrating arteriole density was approximately 8–12 arterioles per  $\text{mm}^2$ , similar to what one report found in cats<sup>41</sup> ( $15.8 \pm 1.2$  arteries per  $\text{mm}^2$ ). This density translates into an inter-arteriole spacing of approximately 300  $\mu\text{m}$  and therefore a neural response window with 200  $\mu\text{m}$  radius (400  $\mu\text{m}$  diameter) around each vessel would provide adequate coverage, as we show in Figs. 2b,c and 3b. Our analysis also included other window sizes (100–600  $\mu\text{m}$  diameter, see Figs. 2f and 3e).

### 2. Spatial scale of neurovascular coupling.

a. Techniques. Whether vascular signals correlate better with synaptic or spiking activity and the range of cortical tissue over which these signals are correlated are controversial<sup>3-7,42-44</sup>. Differences among past studies were in part likely due to the difficulty of measuring synaptic, spiking and hemodynamic signals over equivalent spatial scales. The spatial range over which neural activity may be pooled from extracellular electrophysiological recordings depends on a number of factors including the physical properties of the electrode as well as the type of neural activity being recorded. Well-isolated single-units (action potentials from different neurons) can typically be obtained from only a few cells per electrode and are heavily biased toward the largest and most active neurons near the electrode tip<sup>45</sup>. Multi-unit spiking activity can be obtained from up to a few thousand neurons over a range from tens to several hundred microns, and LFPs pool low-frequency electrical activity over a range from a few hundred microns to several millimeters<sup>8,46,47</sup>. Furthermore, coarse-resolution hemodynamic imaging techniques, like fMRI, typically pool over even larger regions, making direct correlations between spiking, synaptic, and vascular activity difficult. An additional complication in these studies is that, although LFPs are used as a surrogate measurement of the synaptic activity in a region, it is still

not known exactly how different features of neural activity contribute to the LFP<sup>46,48</sup>. By imaging all of the neurons over a field of view along with individual vessels in the same region and by having a direct measure of synaptic activity we overcome these limitations.

b. Results. Typically, studies using low-resolution hemodynamic imaging and extracellular electrophysiology have found that hemodynamic signals spread well beyond the region of neural activation with point spread functions (PSFs) generally  $> 1 \text{ mm}$ <sup>4,49-51</sup>, although some studies have found conditions in which the spatial scales more closely match<sup>24,52,53</sup>. These studies correlate neural and vascular signals over spatial scales much larger in size (i.e.,  $500 \mu\text{m}$  to a couple of millimeters) than the regions we integrated over. Although we do not directly measure the complete spatial extent of neural and vascular signals, our finding of vascular responses in tissue where there is little to no concomitant neural activity indicates that vascular signals spread beyond the region of neural activity. However, despite the widespread range of vascular activity, hemodynamic signals have been used to discriminate functional columns in cortex with spacing  $< 1 \text{ mm}$  including orientation columns<sup>27,28,54-59</sup>. Our results are consistent with these earlier studies because the preferred orientation of neighboring arteries differs according to the preference of the neural tissue around each vessel. Thus, by simply looking at the preferred orientation of the dilation signal, orientation maps could be extracted from our data (see Figure 2b,c).

### **3. Glutamate signaling driving vascular responses.**

We show that robust sensory-evoked vascular responses can often occur without a corresponding glutamate signal in the surrounding tissue, e.g., Extended Data Fig. 2. Previous studies using pharmacological manipulations and low-resolution hemodynamic imaging in the neocortex have typically found that blocking post-synaptic glutamate receptors attenuates vascular responses<sup>60-62</sup>, leading to the conclusion that local synaptic activity drives vascular responses (but see ref. [63]). It is difficult to separate the effects of synaptic and spiking activity with a pharmacological approach because widespread application of glutamate receptor antagonists may also eliminate spiking activity across a large population of neurons. Note that because pharmacological agents are typically applied over very large areas of tissue, the remote activity generating the propagating dilation signal (as we propose) would be shut down. Therefore the localized uncoupling of neural and vascular activity that we observed may be

missed with a pharmacological approach. Indeed, an elegant two-photon imaging study in the olfactory bulb showed that a highly localized block of glutamate receptors did not affect blood flow but a widespread application of glutamate receptor antagonists reduced or eliminated it<sup>64</sup>. Note also that our finding of glutamate signals being less orientation selective than calcium signals is consistent with intracellular electrophysiological responses, e.g., excitatory postsynaptic inputs show less orientation selectivity than neuronal spiking<sup>65,66</sup>.

#### **4. Origin of the selectivity of parenchymal vessel dilation to stimulus orientation.**

The main findings of our paper regarding the parenchymal vasculature relate to the selectivity of responses in individual blood vessels along with the spatial regions of neural activity where selectivity may be matched. We assay two aspects of response selectivity in vessels and neural regions—the preferred stimulus and the degree of tuning to a complete set of oriented stimuli. The matching of neural and vessel responses to the best stimulus reaffirms the basic principle of functional hyperemia—a blood flow increase is highest in the most active region of neural tissue. Finding a mismatch in the degree of orientation tuning between responses in vessels and the surrounding neural tissue was a complete surprise. This new information will be critical for the interpretation of data on response selectivity in all vascular-based imaging approaches such as intrinsic signal optical imaging, two-photon imaging and fMRI. Deciphering the exact origin of the less selective vascular signal could take many years to resolve and is beyond the scope of our study. However, below we present an analysis of our data that supports one possibility along with some alternatives that may be considered in future work.

##### **a. Long-range propagation of dilation from one cortical column into neighboring columns.**

We propose that dilation signals in the absence of local neural activity are generated through long range propagation through the vascular wall<sup>23,25,51</sup>. This propagation has been estimated to travel along the vasculature at a speed of 2.4 mm/second<sup>25</sup>. Given that individual iso-orientation domains have widths in the range of several hundred microns<sup>2,67</sup>, the dilation could propagate over a region of cortex that represents the entire span of orientations (a hypercolumn) within one second. Even though our imaging rates were <1 Hz for the majority of the data, we were able to detect differences in dilation onset latencies that were consistent with this hypothesis of a long-range propagated signal. According to our prediction, the local neural activity should first drive dilation in nearby arterioles which then propagates up to the surface<sup>23</sup>. Indeed we found that the

onset latency was faster for parenchymal vessels (mean  $\pm$  s.e.m.  $1.63 \pm 0.15$  seconds;  $n = 79$ ) than for pial vessels ( $2.12 \pm 0.17$  seconds;  $n = 24$ ;  $P < 0.05$ ,  $t$ -test; normal distributions confirmed with Lilliefors  $P > 0.1$ ). Note that although we have a clear relative latency difference between the pial and the parenchymal vessels, because of the slow data acquisition rates used, the absolute numbers of the two groups may not reflect what would be obtained with faster sampling rates<sup>12,23,25,68</sup>. Our hypothesis also predicts that the broader vessel tuning relative to neural activity comes from the dilation signal initiated in vessels from different orientation columns into the vessel we are measuring. Thus, in parenchymal vessels, dilation to the preferred stimulus should appear earlier than dilation to the non-preferred stimulus. We computed the standardized mean difference (Hedge's  $g$ , see Methods) in dilation latency between the preferred and non-preferred orientations for each parenchymal vessel and found faster onset for the preferred orientation ( $g = 0.15$ ;  $P < 0.005$ ; Extended Data Fig. 5a). As a control, we randomized the assignment of the preferred and non-preferred orientations trial-by-trial across the population and found no latency difference ( $g = 0.01$ ;  $P = 0.78$ ; Extended Data Fig. 5b).

b. Long-range release of vasodilators. Another potential explanation for the vascular responses without corresponding neural activity is that blood vessels may be driven directly by neural activity from beyond the regions (300- $\mu$ m-radius windows) we measured. However, it seems unlikely that vasodilating factors such as nitric oxide can diffuse over such long distances ( $> 300 \mu\text{m}$ ) quickly enough to drive rapid stimulus-evoked dilation<sup>69</sup>. Additionally, because this distance substantially exceeds the inter-vessel spacing, it seems unlikely that a given penetrating arteriole would need to supply increased flow to such a large area of neural tissue and therefore should not be directly sensitive to distal neural activity. Long-range neuromodulatory inputs from extrastriate regions<sup>6</sup> and/or deep brain structures<sup>5,70</sup> have been proposed as the explanation of a large scale decoupling that has been found in awake behaving subjects. However, because our experiments were performed under anesthesia, the fine-scale spatial decoupling we observed here (e.g., Extended Data Fig. 2) is unlikely to originate from these neuromodulatory inputs.

c. Cortical laminar-dependent selectivity of neural responses. Compared to our primary measurements in cortical layer 2/3, it is possible that neural activity in other layers, e.g., layer 4, is broader (less tuned for stimulus orientation) and represents the main driver of vascular signals. These relatively weakly-tuned neural responses drive vessel dilation locally which might then propagate retrogradely over relatively short distances into layer 2/3, where we detect them (but

see below). This short-range retrograde propagation is distinct from the long-range propagation into neighboring columns that we propose in section 4a.

To examine the role of layer 1 activity in broadening the vascular response, we measured neuronal spiking and excitatory synaptic activity in layer 1 of cat visual cortex. Layer 1 in cat visual cortex has very few neuronal cell bodies but across three imaged regions in two cats, we obtained OSI values of spiking activity from 8 significantly responding neurons (Extended Data Fig. 10a) and found a mean value of 0.74. This layer 1 OSI of neuronal spiking activity was very similar to what we found in layer 2/3 neurons (see Fig. 2a). We also measured 400- $\mu$ m-diameter windows of glutamate release in layer 1 of three cats and found a mean OSI of 0.38 (Extended Data Fig. 10b). This layer 1 OSI of synaptic activity was very similar to our layer 2/3 glutamate selectivity, but nearly twice as selective as the parenchymal blood vessel dilation (0.21). Thus layer 1 synaptic or spiking activity cannot be contributing the orientation selectivity of parenchymal dilation we measured in layer 2/3.

While existing techniques do not allow imaging the activity of the deeper layers (the layer 4 border is  $\sim$ 1 mm from the pial surface in cats), we think it is unlikely that neural activity in layers 4–6 contribute to the relatively broad orientation selectivity of hemodynamic responses in cat layer 2/3 blood vessels, for the following reasons:

*Spiking.* Almost all neurons in cat layer 4–6 have the same orientation selectivity as layer 2/3 neurons when measured with electrophysiological single-unit recording techniques<sup>71-73</sup>.

*Synaptic.* Due to the uniformity of orientation selectivity of spiking activity across lamina<sup>71-73</sup> and the tendency of long-range connections to target similar orientation domains<sup>74-76</sup>, the most likely cortical layer where synaptic activity could be untuned is where most of the thalamic inputs terminate in cat visual cortex, i.e., layer 4. Individual LGN neurons and their axonal inputs are not orientation selective<sup>77,78</sup>. However, even though these LGN inputs in cat visual cortex are strong with excitatory postsynaptic potentials (EPSPs) twice the size of unitary EPSPs evoked from other cortical neurons<sup>79</sup>, these LGN inputs only account for 6% of the glutamate synapses in layer 4<sup>80</sup>. Silencing all recurrent intracortical connections while sparing thalamic input activity eliminates most of the visually-evoked synaptic response<sup>81</sup> and the global hemodynamic response<sup>82,83</sup>. Finally, there are theoretical models<sup>84,85</sup> that support a dominant role for intracortical connections in shaping the overall response and selectivity in cortical layer 4 neurons.

d. Inhibition. Another possible explanation for the mismatch between the selectivity in glutamate and vascular signals is that a specific subclass of neurons broadens the vascular response. In particular, certain types of inhibitory neurons have been shown to modulate arteriole diameter<sup>86,87</sup> and blood flow<sup>60,88-90</sup>. However, inhibitory neurons in layer 2/3 of the cat visual cortex are comparable to excitatory neurons in orientation selectivity<sup>91</sup>. Moreover, hemodynamic effects linked to inhibitory neurons are very slow, requiring up to dozens of seconds before arteriole diameter changes can be detected<sup>86</sup>. Ultimately, the development of fluorescent GABA sensors and the subsequent elucidation of spatial maps of GABAergic responses may resolve the specific role of GABA release in driving sensory-evoked hemodynamic responses. If combined with our iGluSnFR imaging of glutamate release, GABA imaging will provide more complete maps of synaptic transmission.

e. Astrocytes. Although astrocytes have been implicated in neurovascular coupling<sup>16,92</sup>, we have not included them in our analysis. We examined the neural events that lead to vascular signals rather than the cellular and molecular mechanisms that transfer the neural signal to the vasculature. Thus whatever role astrocytes may play, it likely is downstream of the spiking and synaptic activity that initially generates the hemodynamic response. However, astrocytes have been shown to have sharp orientation selectivity<sup>93</sup> and so they might be artificially increasing the selectivity of the calcium windows. We rule out this possibility for the following reasons. Firstly, astrocytes respond very slowly with onsets greater than 5 seconds<sup>93</sup>, which is near the end of our typical neural response window. Secondly, although astrocytes are labeled with OGB, the GCaMP6 AAV serotype and promoter we used exclusively labels neurons and the selectivity of OGB labeled regions (OSI mean  $\pm$  s.e.m. =  $0.5898 \pm 0.032$ ,  $n = 12$ ) was identical to that of the GCaMP6 labeled regions ( $0.5912 \pm 0.034$ ,  $n = 7$ ;  $P = 0.95$ ; Mann-Whitney test).

38 Nishimura, N., Schaffer, C. B., Friedman, B., Lyden, P. D. & Kleinfeld, D. Penetrating arterioles are a bottleneck in the perfusion of neocortex. *Proc. Natl. Acad. Sci. USA* **104**, 365-370 (2007).

39 Weber, B., Keller, A. L., Reichold, J. & Logothetis, N. K. The microvascular system of the striate and extrastriate visual cortex of the macaque. *Cereb Cortex* **18**, 2318-2330 (2008).

40 Adams, D. L., Piserchia, V., Economides, J. R. & Horton, J. C. Vascular Supply of the Cerebral Cortex is Specialized for Cell Layers but Not Columns. *Cereb Cortex* (2014).

41 McHedlishvili, G. & Kuridze, N. The modular organization of the pial arterial system in phylogeny. *J Cereb Blood Flow Metab* **4**, 391-396 (1984).

- 42 Rees, G., Friston, K. & Koch, C. A direct quantitative relationship between the functional  
properties of human and macaque V5. *Nat Neurosci* **3**, 716-723 (2000).
- 43 Lima, B., Cardoso, M. M., Sirotin, Y. B. & Das, A. Stimulus-related neuroimaging in  
task-engaged subjects is best predicted by concurrent spiking. *J. Neurosci.* **34**, 13878-  
13891 (2014).
- 44 Mathiesen, C., Caesar, K., Akgoren, N. & Lauritzen, M. Modification of activity-  
dependent increases of cerebral blood flow by excitatory synaptic activity and spikes in  
rat cerebellar cortex. *J Physiol* **512**, 555-566 (1998).
- 45 Olshausen, B. A. & Field, D. J. How close are we to understanding v1? *Neural Comput.*  
**17**, 1665-1699 (2005).
- 46 Berens, P., Keliris, G. A., Ecker, A. S., Logothetis, N. K. & Tolias, A. S. Feature  
selectivity of the gamma-band of the local field potential in primate primary visual  
cortex. *Front. Neurosci.* **2**, 199-207 (2008).
- 47 Xing, D., Yeh, C. I. & Shapley, R. M. Spatial spread of the local field potential and its  
laminar variation in visual cortex. *J. Neurosci.* **29**, 11540-11549 (2009).
- 48 Katzner, S. *et al.* Local origin of field potentials in visual cortex. *Neuron* **61**, 35-41  
(2009).
- 49 Drake, C. T. & Iadecola, C. The role of neuronal signaling in controlling cerebral blood  
flow. *Brain and Language* **102**, 141-152 (2007).
- 50 Maloney, D. & Grinvald, A. Interactions between electrical activity and cortical  
microcirculation revealed by imaging spectroscopy: implications for functional brain  
mapping. *Science* **272**, 551-554 (1996).
- 51 Iadecola, C., Yang, G., Ebner, T. J. & Chen, G. Local and propagated vascular responses  
evoked by focal synaptic activity in cerebellar cortex. *J Neurophysiol* **78**, 651-659  
(1997).
- 52 Vazquez, A. L., Fukuda, M., Crowley, J. C. & Kim, S. G. Neural and hemodynamic  
responses elicited by forelimb- and photo-stimulation in channelrhodopsin-2 mice:  
insights into the hemodynamic point spread function. *Cereb Cortex* **24**, 2908-2919  
(2014).
- 53 Li, N., van Zijl, P., Thakor, N. & Pelled, G. Study of the spatial correlation between  
neuronal activity and BOLD fMRI responses evoked by sensory and channelrhodopsin-2  
stimulation in the rat somatosensory cortex. *Journal of molecular neuroscience : MN* **53**,  
553-561 (2014).
- 54 Bonhoeffer, T. & Grinvald, A. Iso-orientation domains in cat visual cortex are arranged  
in pinwheel-like patterns. *Nature* **353**, 429-431 (1991).
- 55 Fukuda, M., Moon, C. H., Wang, P. & Kim, S. G. Mapping iso-orientation columns by  
contrast agent-enhanced functional magnetic resonance imaging: reproducibility,  
specificity, and evaluation by optical imaging of intrinsic signal. *J Neurosci* **26**, 11821-  
11832 (2006).
- 56 Duong, T. Q., Kim, D. S., Ugurbil, K. & Kim, S. G. Localized cerebral blood flow  
response at submillimeter columnar resolution. *Proc Natl Acad Sci U S A* **98**, 10904-  
10909 (2001).
- 57 Sheth, S. A. *et al.* Columnar Specificity of Microvascular Oxygenation and Volume  
Responses: Implications for Functional Brain Mapping. *The Journal of Neuroscience* **24**,  
634-641 (2004).

- 58 Moon, C. H., Fukuda, M. & Kim, S.-G. Spatiotemporal characteristics and vascular sources of neural-specific and -nonspecific fMRI signals at submillimeter columnar resolution. *NeuroImage* **64**, 91-103 (2013).
- 59 Yacoub, E., Harel, N. & Ugurbil, K. High-field fMRI unveils orientation columns in humans. *Proceedings of the National Academy of Sciences* **105**, 10607-10612 (2008).
- 60 Lecrux, C. *et al.* Pyramidal neurons are "neurogenic hubs" in the neurovascular coupling response to whisker stimulation. *J. Neurosci.* **31**, 9836-9847 (2011).
- 61 Nielsen, A. N. & Lauritzen, M. Coupling and uncoupling of activity-dependent increases of neuronal activity and blood flow in rat somatosensory cortex. *J Physiol* **533**, 773-785 (2001).
- 62 Lauritzen, M. Reading vascular changes in brain imaging: is dendritic calcium the key? *Nat Rev Neurosci* **6**, 77-85 (2005).
- 63 Scott, N. A. & Murphy, T. H. Hemodynamic responses evoked by neuronal stimulation via channelrhodopsin-2 can be independent of intracortical glutamatergic synaptic transmission. *PLoS One* **7**, e29859 (2012).
- 64 Chaigneau, E. *et al.* The relationship between blood flow and neuronal activity in the rodent olfactory bulb. *J. Neurosci.* **27**, 6452-6460 (2007).
- 65 Carandini, M. & Ferster, D. Membrane potential and firing rate in cat primary visual cortex. *J Neurosci* **20**, 470-484 (2000).
- 66 Marino, J. *et al.* Invariant computations in local cortical networks with balanced excitation and inhibition. *Nature Neuroscience* **8**, 194-201 (2005).
- 67 Ohki, K. *et al.* Highly ordered arrangement of single neurons in orientation pinwheels. *Nature* **442**, 925-928 (2006).
- 68 Nizar, K. *et al.* In vivo Stimulus-Induced Vasodilation Occurs without IP3 Receptor Activation and May Precede Astrocytic Calcium Increase. *The Journal of Neuroscience* **33**, 8411-8422 (2013).
- 69 Lancaster Jr, J. R. A Tutorial on the Diffusibility and Reactivity of Free Nitric Oxide. *Nitric Oxide* **1**, 18-30 (1997).
- 70 Tan, C. O. Anticipatory changes in regional cerebral hemodynamics: a new role for dopamine? *J Neurophysiol* **101**, 2738-2740 (2009).
- 71 Murphy, P. C. & Sillito, A. M. Continuity of orientation columns between superficial and deep laminae of the cat primary visual cortex. *J Physiol* **381**, 95-110 (1986).
- 72 Alonso, J. M. & Martinez, L. M. Functional connectivity between simple cells and complex cells in cat striate cortex. *Nat Neurosci* **1**, 395-403 (1998).
- 73 Shmuel, A. & Grinvald, A. Functional organization for direction of motion and its relationship to orientation maps in cat area 18. *J Neurosci* **16**, 6945-6964 (1996).
- 74 Gilbert, C. & Wiesel, T. Columnar specificity of intrinsic horizontal and corticocortical connections in cat visual cortex. *The Journal of Neuroscience* **9**, 2432-2442 (1989).
- 75 Bosking, W. H., Zhang, Y., Schofield, B. & Fitzpatrick, D. Orientation Selectivity and the Arrangement of Horizontal Connections in Tree Shrew Striate Cortex. *The Journal of Neuroscience* **17**, 2112-2127 (1997).
- 76 Malach, R., Amir, Y., Harel, M. & Grinvald, A. Relationship between intrinsic connections and functional architecture revealed by optical imaging and in vivo targeted biocytin injections in primate striate cortex. *Proceedings of the National Academy of Sciences* **90**, 10469-10473 (1993).



- 77 Reid, R. C. & Alonso, J. M. Specificity of monosynaptic connections from thalamus to visual cortex. *Nature* **378**, 281-284 (1995).
- 78 Kara, P., Reinagel, P. & Reid, R. C. Low response variability in simultaneously recorded retinal, thalamic, and cortical neurons. *Neuron* **27**, 635-646 (2000).
- 79 Stratford, K. J., Tarczy-Hornoch, K., Martin, K. A., Bannister, N. J. & Jack, J. J. Excitatory synaptic inputs to spiny stellate cells in cat visual cortex. *Nature* **382**, 258-261 (1996).
- 80 Ahmed, B., Anderson, J. C., Douglas, R. J., Martin, K. A. & Nelson, J. C. Polyneuronal innervation of spiny stellate neurons in cat visual cortex. *J Comp Neurol* **341**, 39-49 (1994).
- 81 Ferster, D., Chung, S. & Wheat, H. Orientation selectivity of thalamic input to simple cells of cat visual cortex. *Nature* **380**, 249-252 (1996).
- 82 Radhakrishnan, H., Wu, W., Boas, D. & Franceschini, M. A. Study of neurovascular coupling by modulating neuronal activity with GABA. *Brain research* **1372**, 1-12 (2011).
- 83 Harris, S., Jones, M., Zheng, Y. & Berwick, J. Does neural input or processing play a greater role in the magnitude of neuroimaging signals? *Frontiers in Neuroenergetics* **2** (2010).
- 84 Douglas, R. J., Koch, C., Mahowald, M., Martin, K. A. & Suarez, H. H. Recurrent excitation in neocortical circuits. *Science* **269**, 981-985 (1995).
- 85 Somers, D. C., Nelson, S. B. & Sur, M. An emergent model of orientation selectivity in cat visual cortical simple cells. *J Neurosci* **15**, 5448-5465 (1995).
- 86 Cauli, B. *et al.* Cortical GABA interneurons in neurovascular coupling: relays for subcortical vasoactive pathways. *J. Neurosci.* **24**, 8940-8949 (2004).
- 87 Cauli, B. & Hamel, E. Revisiting the role of neurons in neurovascular coupling. *Frontiers in neuroenergetics* **2**, 9 (2010).
- 88 Shmuel, A., Augath, M., Oeltermann, A. & Logothetis, N. K. Negative functional MRI response correlates with decreases in neuronal activity in monkey visual area V1. *Nat. Neurosci.* **9**, 569-577 (2006).
- 89 Devor, A. *et al.* Suppressed neuronal activity and concurrent arteriolar vasoconstriction may explain negative blood oxygenation level-dependent signal. *J. Neurosci.* **27**, 4452-4459 (2007).
- 90 Anenberg, E., Chan, A. W., Xie, Y., LeDue, J. M. & Murphy, T. H. Optogenetic stimulation of GABA neurons can decrease local neuronal activity while increasing cortical blood flow. *J. Cereb. Blood Flow Metab.* (2015).
- 91 Keller, A. J. & Martin, K. A. C. Local Circuits for Contrast Normalization and Adaptation Investigated with Two-Photon Imaging in Cat Primary Visual Cortex. *J. Neurosci.* **35**, 10078-10087 (2015).
- 92 Petzold, G. C. & Murthy, V. N. Role of astrocytes in neurovascular coupling. *Neuron* **71**, 782-797 (2011).
- 93 Schummers, J., Yu, H. & Sur, M. Tuned responses of astrocytes and their influence on hemodynamic signals in the visual cortex. *Science* **320**, 1638-1643 (2008).
